# Supplementary material
Source: PubMed Central journal article supplement (PMC8094033)
Supplement: jamapediatr-e210417-s001.pdf [file jamapediatr-e210417-s001.pdf]

## Supplemental Online Content

Lonsdale C, Sanders T, Parker P, et al. Effect of a scalable school-based intervention on cardiorespiratory fitness in children: a cluster randomized clinical trial. *JAMA Pediatr*. Published online May 3, 2021. doi:10.1001/jamapediatrics.2021.0417

- eFigure 1.** Consolidated Framework for Implementation Research
- eFigure 2.** iPLAY Intervention Components
- eFigure 3.** Online platform screenshots
- eFigure 4.** Summary of Significant Moderator Effects
- eFigure 5.** Sensitivity analysis for incremental cost-effectiveness ratios
- eTable 1.** iPLAY Data Collector Blinding Evaluation
- eTable 2.** iPLAY intervention components and implementation measures
- eTable 3.** Intervention Adoption Rates
- eTable 4.** Intervention Implementation Rates
- eTable 5.** Per Protocol Analyses of Intervention Effects on Primary Outcome
- eTable 6.** Main Sample Secondary Outcomes Baseline Values
- eTable 7.** Main Sample Secondary Outcome Analyses
- eTable 8.** Sub-sample Variables Baseline Values
- eTable 9.** Sub-sample Variables Outcome Analyses

This supplemental material has been provided by the authors to give readers additional information about their work.

eFigure 1. Consolidated Framework for Implementation Research

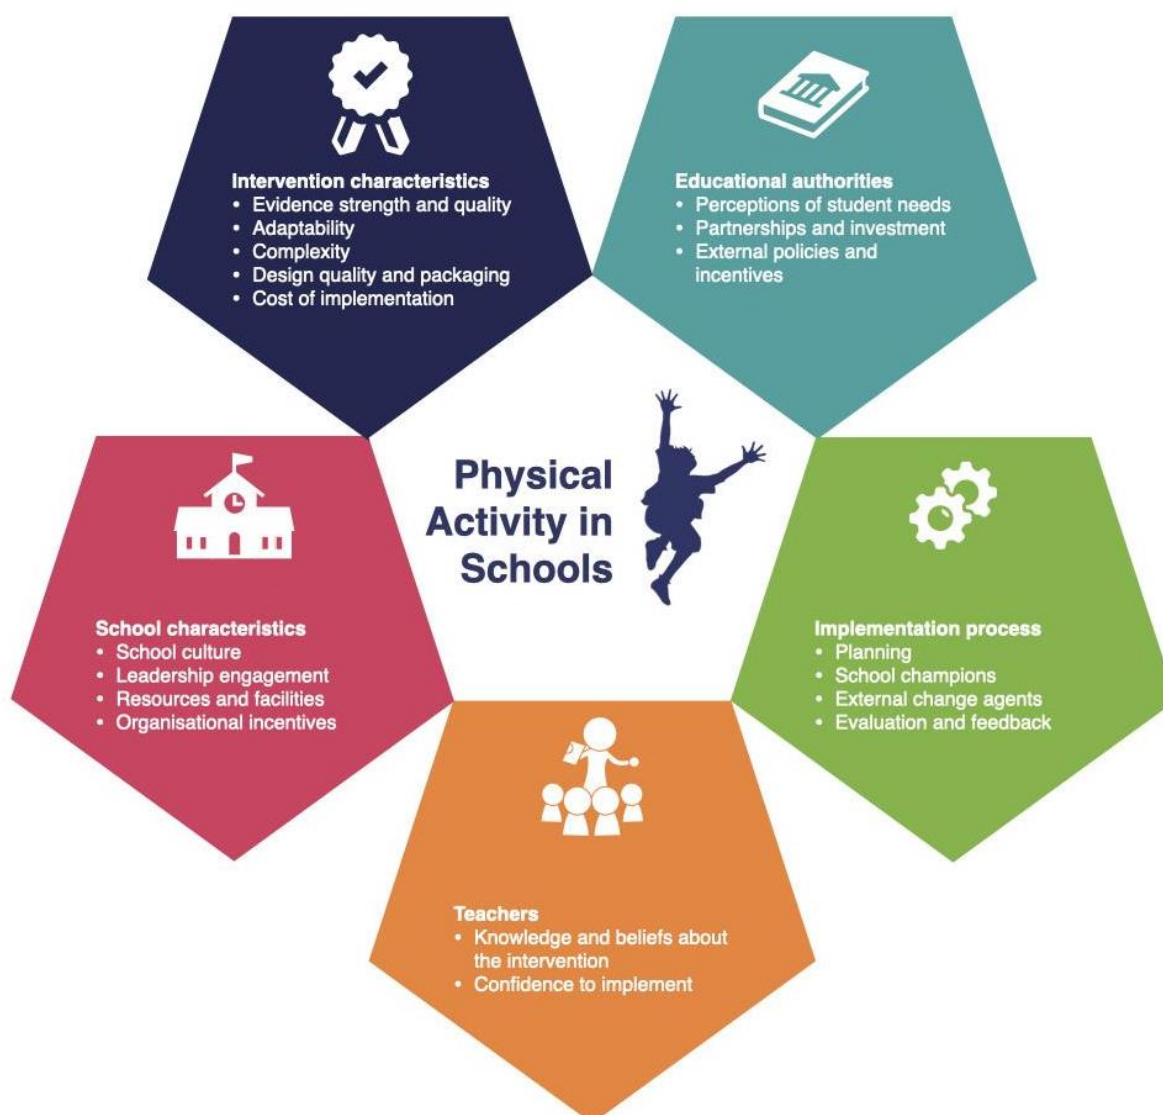

eFigure 2. iPLAY Intervention Components

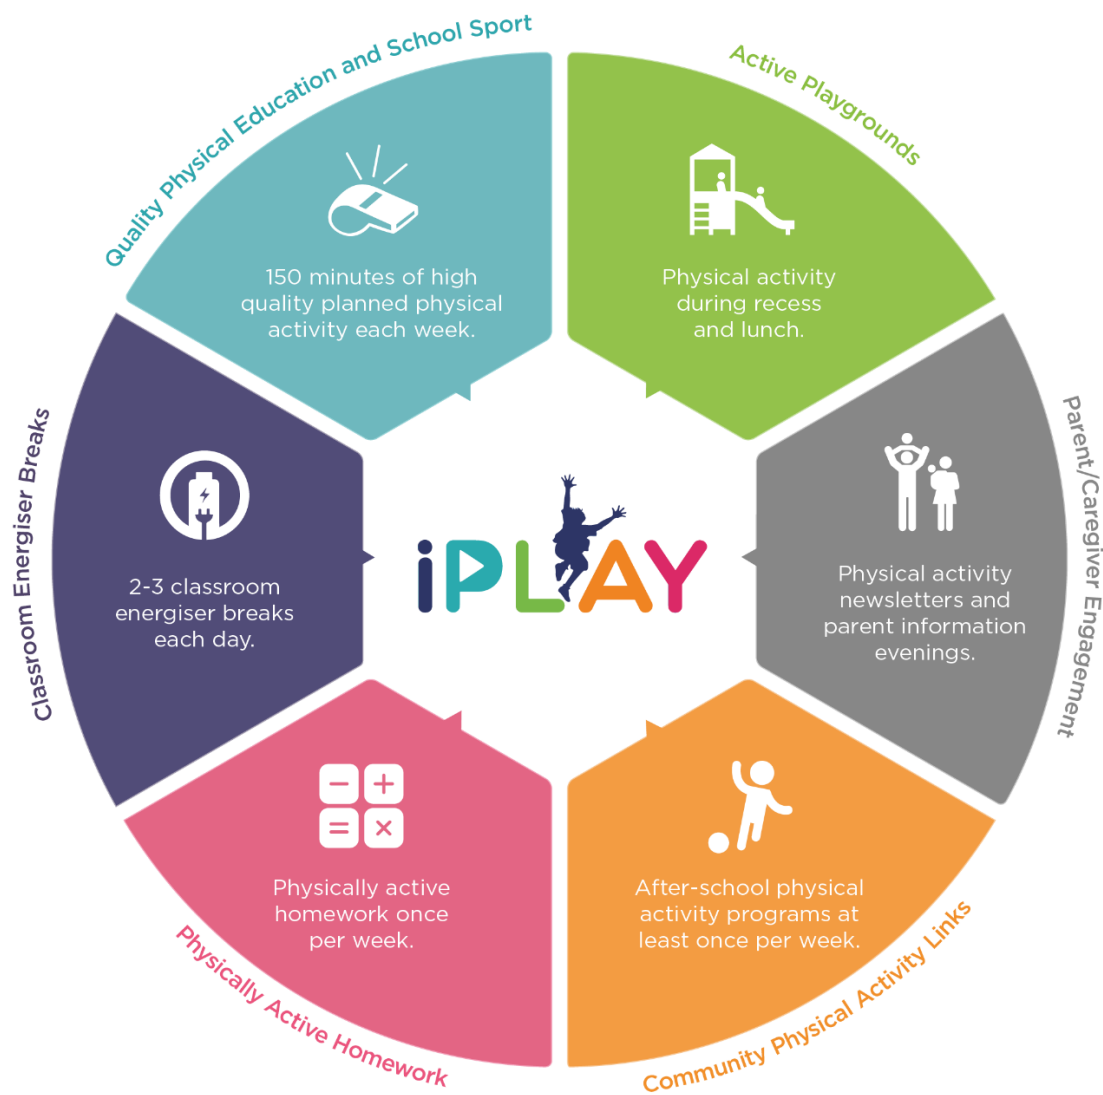

### eFigure 3. Online platform screenshots

Click here to connect with other teachers on the iPLAY Teachers' Facebook Page!

**iPLAY** MY LEARNING ACTION PLANS DASHBOARD RESOURCES CHRIS LONSDALE

Learning >> Teacher Modules

## Teacher Modules

View as   
 Edit Schedule

|                              |                                 |                                 |                            |
|------------------------------|---------------------------------|---------------------------------|----------------------------|
| WELCOME TO iPLAY!            | INTRODUCTORY WORKSHOP           | FAST START                      | CIRCUITS                   |
| SMALL-SIDED & MODIFIED GAMES | EFFECTIVE FEEDBACK              | FAIR & ENJOYABLE                | POSITIVE SOCIAL CLIMATE    |
| CHOICE & RATIONALES          | DIFFERENTIATION & EMPATHY       | MENTOR MEETING                  | PEER LESSON OBSERVATION... |
| POST-SMALL GROUP MEETING...  | ONLINE INTRODUCTORY WORKSHOP... | ONLINE INTRODUCTORY WORKSHOP... |                            |

eFigure 3a - Overview of teachers' online learning

Click here to connect with other teachers on the iPLAY Teachers' Facebook Page!

**iPLAY** MY LEARNING ACTION PLANS DASHBOARD RESOURCES CHRIS LONSDALE

Learning >> Teacher Modules >> Fast Start

## Fast Start

Task 2 of 11: Intro - Starter Games

View as

Please watch this video and then complete the following question.

### TASKS

1. SELF-REFLECTION ON WORKSHOP ACTION PLAN
- 2. INTRO - STARTER GAMES**
3. MODEL ANSWERS
4. GOOD AND POOR PRACTICE - STARTER GAMES
5. MODEL ANSWERS
6. INTRO - FREE PLAY
7. MODEL ANSWERS
8. GOOD AND POOR PRACTICE - FREE PLAY
9. MODEL ANSWERS
10. MY PRACTICE
11. ACTION PLAN

# Active A

## Starter Games

02:24

How might starter games have a positive influence on students in your lesson? Think broadly; consider all the benefits to students' physical activity, fundamental movement skills and motivation to be physically active.

x

eFigure 3b - Example teacher module

Click here to connect with other teachers on the iPLAY Teachers' Facebook Page!

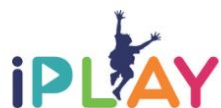

MY LEARNING ACTION PLANS DASHBOARD RESOURCES & CHRIS LONSDALE ▾

Learning >> iPLAY Leader Modules

## iPLAY Leader Modules

View as ▾

Edit Schedule

|                                                            |                                                  |                                                         |                                                         |
|------------------------------------------------------------|--------------------------------------------------|---------------------------------------------------------|---------------------------------------------------------|
| <p>INTRODUCTION AND IMPORTANCE OF PHYSICAL ACTIVITY...</p> | <p>ACTIVE PLAYGROUNDS (20MIN)</p>                | <p>PARENT ENGAGEMENT AND ACTIVE HOMEWORK (30MIN)</p>    | <p>COMMUNITY PHYSICAL ACTIVITY LINKS (20MIN)</p>        |
| <p>SUPPORTING COLLEAGUES (10MINS)</p>                      | <p>iPLAY LEADER ACTION PLAN MEETING – TERM A</p> | <p>ACTION PLAN MEETING PREPARATION – TERM B (30MIN)</p> | <p>ACTION PLAN MEETING PREPARATION – TERM C (30MIN)</p> |
| <p>ACTION PLAN MEETING PREPARATION – TERM D (30MIN)</p>    | <p>LEADING SMALL GROUP DISCUSSIONS – TERM D</p>  | <p>iPLAY LEADER EVALUATION</p>                          |                                                         |

eFigure 3c - Overview of leaders' online learning

[Click here to connect with other teachers on the iPLAY Teachers' Facebook Page!](#)



MY LEARNING   ACTION PLANS   DASHBOARD   RESOURCES   CHRIS LONSDALE

Learning >> iPLAY Leader Modules >> Active Playgrounds (20min)

## Active Playgrounds (20min)

Task 1 of 2: Active Playgrounds - Video

View as 

### TASKS

- 1. ACTIVE PLAYGROUNDS - VIDEO 
- 2. ACTIVE PLAYGROUNDS - MODEL ANSWERS 



### Active Playgrounds



eFigure 3d - Example leader module

eFigure 4. Summary of Significant Moderator Effects

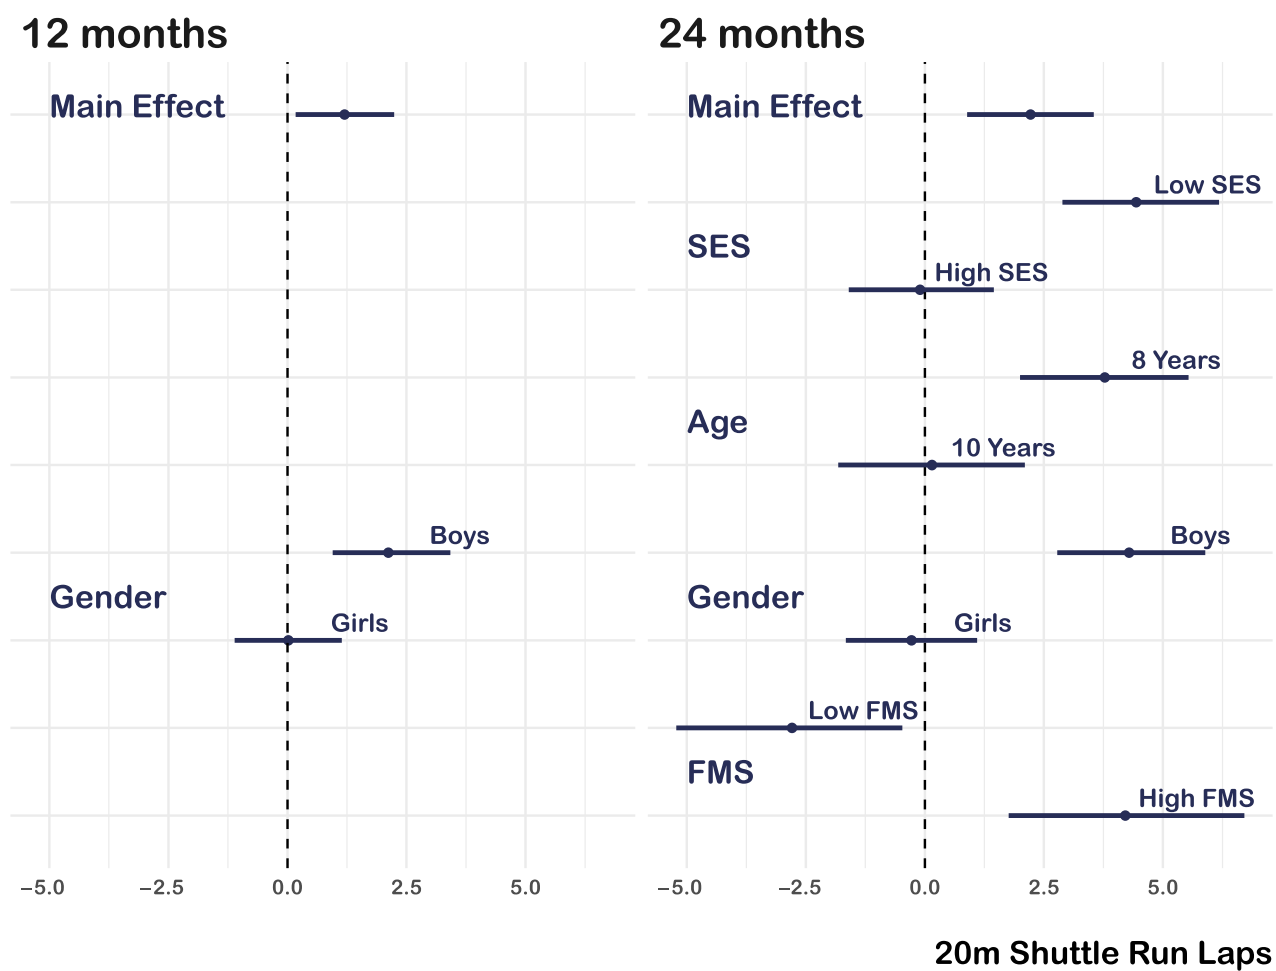



**eFigure 5. Sensitivity analysis for incremental cost-effectiveness ratios**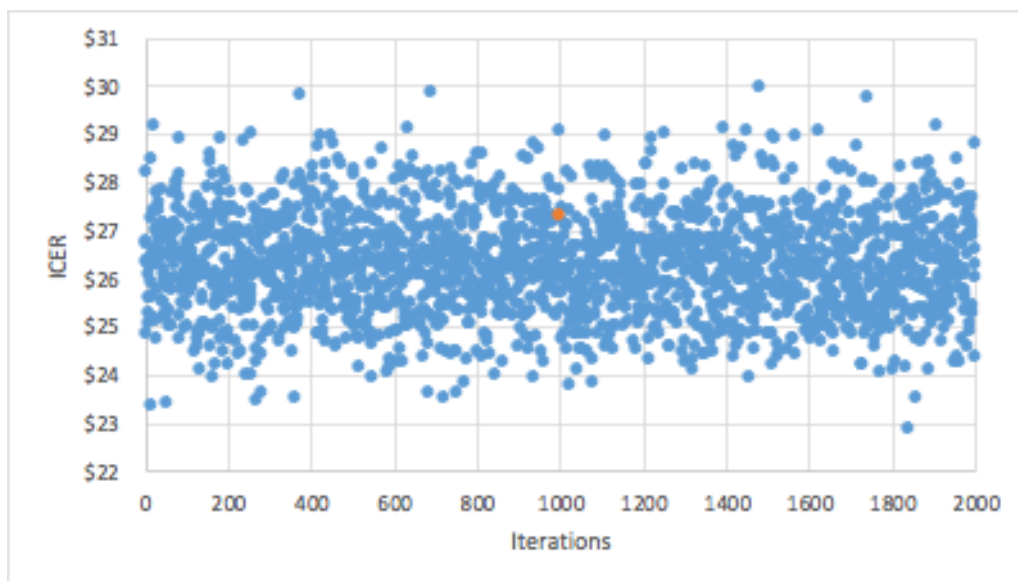

eFigure S5a: Sensitivity analysis for the incremental cost-effectiveness ratios (ICERs) at 12 months derived from bootstrapping. The ICER for the base case is represented by the orange plot. Values are presented in AUD (2018).

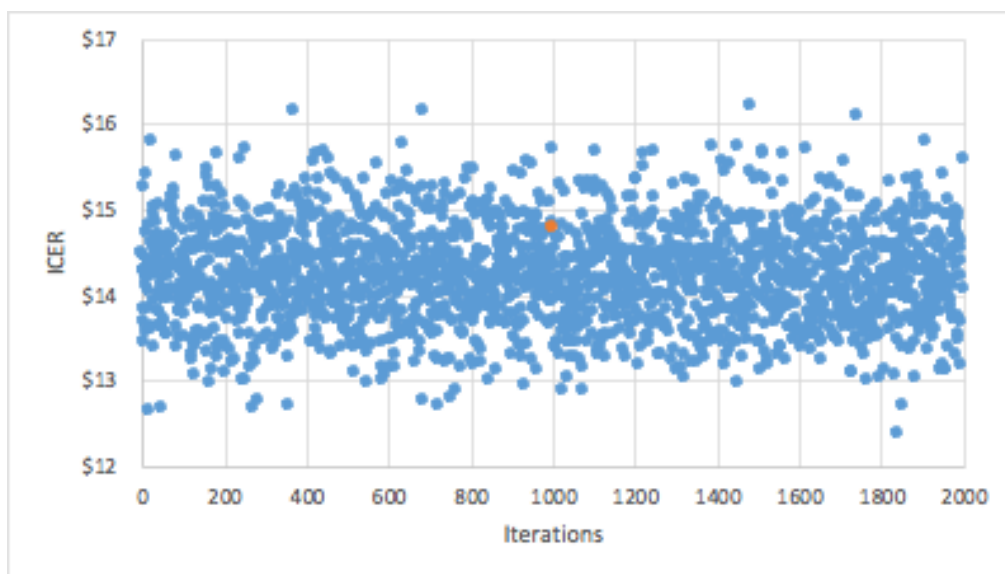

eFigure S5b: Sensitivity analysis for the incremental cost-effectiveness ratios (ICERs) at 24 months derived from bootstrapping. The ICER for the base case is represented by the orange plot. Values are presented in AUD (2018).

**eTable 1. iPLAY Data Collector Blinding Evaluation**

| School Code | Actual Trial Arm | Research assistants' responses to: "Was this school intervention or control?" <sup>a</sup> | If you know the school was intervention or control, how did you find out?                                                 | Blinding Status     |
|-------------|------------------|--------------------------------------------------------------------------------------------|---------------------------------------------------------------------------------------------------------------------------|---------------------|
| 1           | Intervention     | I know it was intervention                                                                 | Research Assistant A: "iPLAY poster in front office window of school viewed upon entry."                                  | Unblinded           |
| 2           | Control          | I don't know                                                                               | N/A                                                                                                                       | Blinding maintained |
| 3           | Control          | I don't know                                                                               | N/A                                                                                                                       | Blinding maintained |
| 4           | Intervention     | I don't know                                                                               | N/A                                                                                                                       | Blinding maintained |
| 5           | Intervention     | I don't know                                                                               | N/A                                                                                                                       | Blinding maintained |
| 6           | Control          | I don't know                                                                               | N/A                                                                                                                       | Blinding maintained |
| 7           | Intervention     | I don't know                                                                               | N/A                                                                                                                       | Blinding maintained |
| 8           | Intervention     | I don't know                                                                               | N/A                                                                                                                       | Blinding maintained |
| 9           | Control          | I don't know                                                                               | N/A                                                                                                                       | Blinding maintained |
| 10          | Control          | I don't know                                                                               | N/A                                                                                                                       | Blinding maintained |
| 11          | Control          | I don't know                                                                               | N/A                                                                                                                       | Blinding maintained |
| 12          | Intervention     | I don't know                                                                               | N/A                                                                                                                       | Blinding maintained |
| 13          | Intervention     | I know it was intervention.                                                                | Research Assistant D: "iPLAY materials posted at school and a teacher disclosed that they had received the intervention." | Unblinded           |
| 14          | Control          | I don't know                                                                               | N/A                                                                                                                       | Blinding maintained |
| 15          | Control          | I don't know                                                                               | N/A                                                                                                                       | Blinding maintained |
| 16          | Control          | I don't know                                                                               | N/A                                                                                                                       | Blinding maintained |

|    |              |                             |                                                                                                         |                     |
|----|--------------|-----------------------------|---------------------------------------------------------------------------------------------------------|---------------------|
| 17 | Intervention | I know it was intervention. | Research Assistant C: "This school had <i>iPLAY</i> resources displayed in the window."                 | Unblinded           |
| 18 | Intervention | I don't know                | N/A                                                                                                     | Blinding maintained |
| 19 | Intervention | I know it was intervention. | Research Assistant D: "A teacher at the school mentioned that they had received <i>iPLAY</i> training." | Unblinded           |
| 20 | Control      | I don't know                | N/A                                                                                                     | Blinding maintained |
| 21 | Control      | I don't know                | N/A                                                                                                     | Blinding maintained |
| 22 | Intervention | I don't know                | N/A                                                                                                     | Blinding maintained |

Note: <sup>a</sup> Response options included: 1. I don't know, 2. I know it was control, 3. I know it was intervention.

**eTable 2. iPLAY intervention components and implementation measures**

| <b>Curricular Components</b>     | <b>Intended Implementation</b>                                                                                                                                                                                                                                                                                                                                | <b>Implementation Measurement</b>                                                                                                                                                                                                                                                                                                                                                                                          |
|----------------------------------|---------------------------------------------------------------------------------------------------------------------------------------------------------------------------------------------------------------------------------------------------------------------------------------------------------------------------------------------------------------|----------------------------------------------------------------------------------------------------------------------------------------------------------------------------------------------------------------------------------------------------------------------------------------------------------------------------------------------------------------------------------------------------------------------------|
| Quality PE and school sport      | <ul style="list-style-type: none"> <li>Teachers will deliver 150 minutes of planned PE or school sport each week.</li> <li>Lessons will be delivered according to the SAAFE principles (Supportive, Active, Autonomous, Fair and Enjoyable).</li> <li>Students will spend &gt;40% of PE/sport lesson time being physically active (i.e., in MVPA).</li> </ul> | <ul style="list-style-type: none"> <li>Classroom teachers self-reported delivery of PE and School Sport at the start of each online learning module (i.e., up to 8 times).</li> <li>Mentors observed and rated each teacher's delivery using the SAAFE checklist once during the intervention.</li> <li>Monitored using the class activity tracking system provided to each school.</li> </ul>                             |
| Classroom movement breaks        | <ul style="list-style-type: none"> <li>Teachers will deliver 2 x 3-minute classroom energizer activities per day (30 minutes per week)</li> </ul>                                                                                                                                                                                                             | <ul style="list-style-type: none"> <li>Teachers self-reported at the start of each online learning module.</li> </ul>                                                                                                                                                                                                                                                                                                      |
| Physically active homework       | <ul style="list-style-type: none"> <li>Teachers will provide one physically active homework activity per week (except in schools that have a 'no homework' policy)</li> </ul>                                                                                                                                                                                 | <ul style="list-style-type: none"> <li>Teachers self-reported at the start of each of each online learning module.</li> </ul>                                                                                                                                                                                                                                                                                              |
| <b>Non-Curricular Components</b> | <b>Intended Implementation</b>                                                                                                                                                                                                                                                                                                                                | <b>Implementation Measurement</b>                                                                                                                                                                                                                                                                                                                                                                                          |
| Active playgrounds               | <ul style="list-style-type: none"> <li>Children will spend &gt;40% of recess and lunch breaks in MVPA.</li> </ul>                                                                                                                                                                                                                                             | <ul style="list-style-type: none"> <li>Leaders rated via the website their implementation of active playground strategies. Ratings occurred up to three times during the intervention (during meetings with mentors).</li> <li>Student physical activity during breaks measured via accelerometry at each assessment time-point (baseline, 12 months, 24 months), but was not measured during the intervention.</li> </ul> |

|                                   |                                                                                                                                                                                                                                                                                                                                                                                                                                           |                                                                                                                                                                                                              |
|-----------------------------------|-------------------------------------------------------------------------------------------------------------------------------------------------------------------------------------------------------------------------------------------------------------------------------------------------------------------------------------------------------------------------------------------------------------------------------------------|--------------------------------------------------------------------------------------------------------------------------------------------------------------------------------------------------------------|
| Community physical activity links | <ul style="list-style-type: none"> <li>Schools will utilize the ‘Sporting Schools’ funding to offer after-school physical activity program at least once per week across two school terms.</li> <li>During the intervention at least one teacher in each school will complete accreditation/training procedures with a recognized sporting body that will allow them to deliver the Sporting Schools’ program in their school.</li> </ul> | <ul style="list-style-type: none"> <li>Principals reported on all non-curricular sport and recreation in each school.</li> <li>Teachers reported the sport accreditation/training they completed.</li> </ul> |
| Parent and caregiver engagement   | <ul style="list-style-type: none"> <li>Schools will deliver 1 x newsletter item per fortnight, which will include a link to the parent portion of the <i>iPLAY</i> website.</li> <li>Schools will deliver 2 x <i>iPLAY</i> update presentations to parents per year during existing parent-teacher events.</li> <li>Schools will organize one physically active school fundraising event each year.</li> </ul>                            | <ul style="list-style-type: none"> <li>Leaders recorded via the website the frequency of newsletter distribution and parent meetings.</li> <li>Leaders self-reported school fundraiser events.</li> </ul>    |

**eTable 3. Intervention Adoption Rates**

|                                                                                                                                                                            | <i>Proportion Adopted</i> |                  |
|----------------------------------------------------------------------------------------------------------------------------------------------------------------------------|---------------------------|------------------|
|                                                                                                                                                                            | <i>12 months</i>          | <i>24 months</i> |
| <i>Core Learning Components</i>                                                                                                                                            |                           |                  |
| <i>Leader Adoption</i>                                                                                                                                                     |                           |                  |
| Leader online learning - 5 modules                                                                                                                                         | 100% schools              | 100% schools     |
| Leader action planning meetings - 4 modules                                                                                                                                | 36% schools               | 91% schools      |
| Total leader modules - 9 modules                                                                                                                                           | 36% schools               | 91% schools      |
| <i>Leader adoption as per protocol (i.e., at least one leader at the school completed all professional learning modules and attended at least one action plan meeting)</i> | 89% schools               | 100% schools     |
| <i>Teacher Adoption</i>                                                                                                                                                    |                           |                  |
| Teacher workshop module                                                                                                                                                    | 100% teachers             | 100% teachers    |
| Teacher online learning - 8 modules                                                                                                                                        | 20% teachers              | 63% teachers     |
| Teacher school-based reflection - 3 modules                                                                                                                                | 11% teachers              | 63% teachers     |
| Total teacher modules - 12 modules                                                                                                                                         | 10% teachers              | 61% teachers     |
| <i>Teacher adoption as per protocol (i.e., the teacher completed at least 50% of the 12 professional learning modules)<sup>a</sup></i>                                     | 48% teachers              | 71% teachers     |
| <i>Additional Teacher Learning Components</i>                                                                                                                              |                           |                  |
| Downloaded resources                                                                                                                                                       | 82% teachers              | 82% teachers     |
| Downloaded mobile app                                                                                                                                                      | 19% teachers              | 19% teachers     |
| Used class activity monitoring system <sup>b</sup>                                                                                                                         | 58% teachers              | 59% teachers     |
| Used posters, water bottles or lanyards                                                                                                                                    | 100% schools              | 100% schools     |

Note: <sup>a</sup> We used 50% as the per protocol threshold for adoption. Adult online learners typically do not complete their courses. Thus, we deemed a 50% completion rate to be considerable. <sup>b</sup> As noted in our protocol, we designed the class activity tracker to upload data so that the research team could access and track each teachers' usage of the system. Department of Education firewalls in most schools prevented these uploads and we, therefore, could not access the data. Instead, we report teachers' self-reported intentions to use the class activity. Delays with our software development company meant that the mobile app was not available for download until partway through Cohort 3's participation in the trial (August 2018). This delay likely accounts for the low rate of the app's adoption.

**eTable 4. Intervention Implementation Rates**

|                                                                                                                                   | <i>Proportion Implemented</i> |                  |
|-----------------------------------------------------------------------------------------------------------------------------------|-------------------------------|------------------|
|                                                                                                                                   | <i>12 months</i>              | <i>24 months</i> |
| <i>Leader Implementation - Non-curricular Components</i>                                                                          |                               |                  |
| Active playgrounds - leader reports of implementing recommended strategies                                                        | 45% schools                   | 45% schools      |
| School mean >40% of total break time spent in MVPA (accelerometers)                                                               | 0% schools                    | 0% schools       |
| Sporting Schools funding used (principal report)                                                                                  | 73% schools                   | 73% schools      |
| At least one teacher complete accreditation to with a recognized sporting body (teacher report)                                   | 64% schools                   | 64% schools      |
| Parent newsletter distribution (leader report)                                                                                    | 45% schools                   | 45% schools      |
| Parent info sessions (leader report)                                                                                              | 27% schools                   | 27% schools      |
| One physically active school fundraiser (leader report)                                                                           | 9% schools                    | 9% schools       |
| <i>Leader implementation as per protocol (i.e., the school implemented at least 50% implemented of non-curricular strategies)</i> | 52% schools                   | 51% schools      |
| <i>Teacher Implementation - Curricular Components</i>                                                                             | <i>12 months</i>              | <i>24 months</i> |
| 150 mins of PE/sport/week (teacher reported - median across modules)                                                              | 42% teachers                  | 47% teachers     |
| Mean SAAFE rating > 3.0 rating (mentor rated)                                                                                     | 93% teachers                  | 91% teachers     |
| 10 classroom energizers per week (mean of teacher reports)                                                                        | 37% teachers                  | 38% teachers     |
| 1 weekly active homework activity (excluding schools with no homework policy) (mean of teacher reports)                           | 49% teachers                  | 46% teachers     |
| Teacher implementation as per protocol (i.e., teacher implemented 50% of strategies)                                              | 30% teachers                  | 22% teachers     |
| <i>Teacher Evaluations of Workshop</i>                                                                                            |                               |                  |
| Theoretical portion of the workshop (1-5 rating)                                                                                  | 4.6 (0.7)                     | NA               |
| Practical portion of the workshop (1-5 rating)                                                                                    | 4.6 (0.8)                     | NA               |
| How engaging was your mentor? (1-5 rating)                                                                                        | 4.5 (0.8)                     | NA               |

*Note:* As noted in our protocol, we designed a class activity tracker to upload data so that the research team could access and track each teachers' usage of the system. One of our implementation criteria was the proportion of physical education lesson time spent in moderate-to-vigorous physical activity should be greater than 40%. Department of Education firewalls in most schools prevented uploads from our tracker system and we, therefore, could not access the data.

**eTable 5. Per Protocol Analyses of Intervention Effects on Primary Outcome**

| Variable               | Follow-up | Condition    | Met protocol<br>(n students) | Did not meet protocol<br>(n students) | Adjusted difference in 20m shuttle test laps<br>between treated vs non-treated |
|------------------------|-----------|--------------|------------------------------|---------------------------------------|--------------------------------------------------------------------------------|
| <i>Teachers</i>        |           |              |                              |                                       |                                                                                |
| Teacher Adoption       | 12 Months | Intervention | 165                          | 294                                   | 2.16 [-2.14,6.46]                                                              |
|                        |           | Control      | 0                            | 562                                   |                                                                                |
|                        | 24 Months | Intervention | 236                          | 172                                   | 3.35 [-0.41,7.11]                                                              |
|                        |           | Control      | 0                            | 514                                   |                                                                                |
| Teacher Implementation | 12 Month  | Intervention | 136                          | 323                                   | 2.66 [-2.46,7.78]                                                              |
|                        |           | Control      | 0                            | 562                                   |                                                                                |
|                        | 24 Months | Intervention | 91                           | 317                                   | 9.24 [-0.9,19.38]                                                              |
|                        |           | Control      | 0                            | 514                                   |                                                                                |
| <i>Leaders</i>         |           |              |                              |                                       |                                                                                |
| Leader Adoption        | 12 Months | Intervention | 409                          | 50                                    | 0.88 [-0.86,2.62]                                                              |
|                        |           | Control      | 0                            | 562                                   |                                                                                |
|                        | 24 Months | Intervention | 408                          | 0                                     | NA. All leaders met protocol.                                                  |
|                        |           | Control      | 0                            | 514                                   |                                                                                |
| Leader Implementation  | 12 Month  | Intervention | 239                          | 220                                   | 1.54 [-1.84,4.91]                                                              |
|                        |           | Control      | 0                            | 562                                   |                                                                                |
|                        | 24 Months | Intervention | 209                          | 199                                   | 3.7 [-2.47,9.86]                                                               |
|                        |           | Control      | 0                            | 514                                   |                                                                                |

*Note:* Teacher adoption = student's teacher completed at least 50% of modules. Teacher implementation = student's teacher implemented at least 50% of strategies. Leader adoption = student's school had a leader who completed all 5 learning modules + 50% of action plans.



---

Leader implementation = student's school implemented at least 50% of strategies. We conducted per-protocol analysis using an instrumental variable approach with shuttle runs coded as continuous and with the application of cluster-robust standard errors.

**eTable 6. Main Sample Secondary Outcomes Baseline Values**

| Variable                                                         | N<br>(n intervention) | Control<br>Mean | Control SD | Intervention<br>Mean | Intervention<br>SD | Total Mean | Total SD |
|------------------------------------------------------------------|-----------------------|-----------------|------------|----------------------|--------------------|------------|----------|
| School MVPA (mins/day)                                           | 926 (424)             | 42.53           | 16.09      | 41.97                | 15.29              | 42.27      | 15.72    |
| Lunch/Recess Breaks MVPA (mins/day)                              | 926 (424)             | 18.66           | 8.52       | 14.28                | 6.99               | 16.65      | 8.15     |
| After School MVPA (mins/day)                                     | 926 (424)             | 33.17           | 15.22      | 35.95                | 16.82              | 34.45      | 16.02    |
| Weekend MVPA (mins/day)                                          | 925 (423)             | 77.74           | 36.37      | 76.53                | 33.42              | 77.19      | 35.04    |
| Total MVPA (mins/day)                                            | 925 (423)             | 85.90           | 28.03      | 87.30                | 28.79              | 86.54      | 28.37    |
| Self-reported PA usual week (days/week)                          | 1195 (558)            | 5.03            | 1.97       | 4.88                 | 2.03               | 4.96       | 2.00     |
| Self-reported PA this week (days/week)                           | 1197 (558)            | 5.17            | 1.97       | 5.19                 | 2.01               | 5.18       | 1.99     |
| Self-reported PA team sport participation in the past year       | 1197 (558)            | 70.74%          | NA         | 63.62%               | NA                 | 67.42%     | NA       |
| Self-reported PA individual sport participation in the past year | 1196 (558)            | 65.36%          | NA         | 61.47%               | NA                 | 63.55%     | NA       |
| Self-reported PA active travel (days/week)                       | 1197 (558)            | 2.27            | 2.15       | 2.79                 | 2.18               | 2.52       | 2.18     |
| NAPLAN Numeracy                                                  | 890 (378)             | -0.45           | 0.92       | -0.54                | 0.89               | -0.49      | 0.91     |
| NAPLAN Literacy                                                  | 889 (378)             | -0.39           | 0.95       | -0.46                | 0.92               | -0.42      | 0.94     |
| Wellbeing                                                        | 1172 (546)            | 40.94           | 5.84       | 41.10                | 5.52               | 41.01      | 5.69     |
| PE Psychological needs support from teacher                      | 1197 (558)            | 4.06            | 0.73       | 4.14                 | 0.70               | 4.10       | 0.72     |
| PE Concentration                                                 | 1196 (558)            | 4.48            | 0.63       | 4.47                 | 0.60               | 4.48       | 0.61     |
| PE Effort                                                        | 1196 (558)            | 4.60            | 0.60       | 4.63                 | 0.57               | 4.61       | 0.59     |
| PE Learning strategy use                                         | 1196 (558)            | 3.95            | 0.84       | 3.92                 | 0.87               | 3.94       | 0.85     |
| PE Enjoyment                                                     | 1197 (558)            | 4.54            | 0.72       | 4.61                 | 0.70               | 4.58       | 0.71     |

**eTable 7. Main Sample Secondary Outcome Analyses**

| Variable                                                         | Follow-up | N<br>(n intervention) | Change from Baseline:<br>Control | Change from Baseline:<br>Intervention | Adjusted Difference<br>(intervention v control) |
|------------------------------------------------------------------|-----------|-----------------------|----------------------------------|---------------------------------------|-------------------------------------------------|
| <b>Secondary Outcomes: Main Sample</b>                           |           |                       |                                  |                                       |                                                 |
| School MVPA (mins/day)                                           | 12 Month  | 753 (332)             | -5.20 [-7.18, -3.17]             | -4.22 [-6.46, -1.98]                  | 0.98 [-2.04, 4.01]                              |
|                                                                  | 24 Month  | 577 (260)             | -6.07 [-8.27, -3.86]             | -4.87 [-7.31, -2.42]                  | 1.21 [-2.05, 4.41]                              |
| Lunch/Recess Breaks MVPA (mins/day)                              | 12 Month  | 753 (332)             | -4.78 [-5.63, -3.93]             | -1.10 [-2.08, -0.15]                  | 3.68 [2.40, 4.98]                               |
|                                                                  | 24 Month  | 577 (260)             | -4.82 [-5.77, -3.86]             | -1.36 [-2.41, -0.30]                  | 3.46 [2.04, 4.88]                               |
| After School MVPA (mins/day)                                     | 12 Month  | 753 (332)             | -2.75 [-4.54, -0.96]             | -3.70 [-5.70, -1.70]                  | -0.95 [-3.67, 1.71]                             |
|                                                                  | 24 Month  | 577 (260)             | -7.38 [-9.40, -5.35]             | -9.77 [-11.94, -7.52]                 | -2.39 [-5.37, 0.59]                             |
| Weekend MVPA (mins/day)                                          | 12 Month  | 753 (332)             | -8.91 [-13.09, -4.70]            | -4.05 [-8.75, 0.66]                   | 4.85 [-1.42, 11.20]                             |
|                                                                  | 24 Month  | 576 (259)             | -16.80 [-21.43, -12.26]          | -17.91 [-23.10, -12.90]               | -1.11 [-8.10, 5.79]                             |
| Total MVPA (mins/day)                                            | 12 Month  | 753 (332)             | -5.58 [-8.79, -2.32]             | -5.00 [-8.68, -1.35]                  | 0.58 [-4.23, 5.45]                              |
|                                                                  | 24 Month  | 576 (259)             | -12.77 [-16.29, -9.21]           | -13.87 [-17.76, -9.94]                | -1.09 [-6.54, 4.18]                             |
| Self-reported PA usual week (days/week)                          | 12 Month  | 1000 (443)            | -0.06 [-0.23, 0.12]              | 0.00 [-0.19, 0.19]                    | 0.06 [-0.20, 0.32]                              |
|                                                                  | 24 Month  | 890 (384)             | 0.00 [-0.17, 0.18]               | 0.04 [-0.17, 0.25]                    | 0.04 [-0.23, 0.31]                              |
| Self-reported PA this week (days/week)                           | 12 Month  | 1001 (444)            | 0.05 [-0.13, 0.22]               | -0.18 [-0.37, 0.02]                   | -0.23 [-0.49, 0.04]                             |
|                                                                  | 24 Month  | 890 (384)             | -0.05 [-0.23, 0.13]              | -0.11 [-0.31, 0.10]                   | -0.06 [-0.34, 0.21]                             |
| Self-reported PA team sport participation in the past year       | 12 Month  | 1001 (444)            | -0.00 [-0.04, 0.04]              | 0.04 [-0.01, 0.08]                    | 0.04 [-0.02, 0.10]                              |
|                                                                  | 24 Month  | 889 (384)             | 0.03 [-0.01, 0.08]               | 0.06 [0.01, 0.11]                     | 0.03 [-0.04, 0.09]                              |
| Self-reported PA individual sport participation in the past year | 12 Month  | 1001 (444)            | -0.04 [-0.09, 0.01]              | -0.05 [-0.10, 0.00]                   | -0.01 [-0.08, 0.06]                             |
|                                                                  | 24 Month  | 890 (384)             | -0.05 [-0.10, 0.00]              | -0.07 [-0.12, -0.01]                  | -0.02 [-0.09, 0.06]                             |
| Self-reported PA active travel (days/week)                       | 12 Month  | 1001 (444)            | -0.11 [-0.30, 0.08]              | -0.02 [-0.23, 0.19]                   | 0.09 [-0.19, 0.38]                              |

|                                             | 24 Month         | 890 (384)                     | 0.21 [0.02, 0.41]                        | 0.05 [-0.17, 0.27]                            | -0.16 [-0.46, 0.1]                                      |
|---------------------------------------------|------------------|-------------------------------|------------------------------------------|-----------------------------------------------|---------------------------------------------------------|
| <b>Variable</b>                             | <b>Follow-up</b> | <b>N<br/>(n intervention)</b> | <b>Change from Baseline:<br/>Control</b> | <b>Change from Baseline:<br/>Intervention</b> | <b>Adjusted Difference<br/>(intervention v control)</b> |
| BMI (raw)                                   | 12 Month         | 992 (435)                     | 0.79 [0.69, 0.90]                        | 0.74 [0.63, 0.86]                             | -0.06 [-0.21, 0.10]                                     |
|                                             | 24 Month         | 878 (372)                     | 1.62 [1.52, 1.73]                        | 1.56 [1.43, 1.68]                             | -0.07 [-0.23, 0.10]                                     |
| BMI-z                                       | 12 Month         | 992 (435)                     | 0.02 [-0.01, 0.05]                       | -0.00 [-0.04, 0.03]                           | -0.02 [-0.07, 0.02]                                     |
|                                             | 24 Month         | 878 (372)                     | 0.04 [0.01, 0.07]                        | -0.00 [-0.04, 0.03]                           | -0.04 [-0.09, 0.01]                                     |
| NAPLAN Numeracy                             | 12 Month         | 771 (313)                     | 1.07 [1.02, 1.13]                        | 1.01 [0.95, 1.07]                             | -0.06 [-0.14, 0.02]                                     |
|                                             | 12 Month         | 773 (312)                     | 0.88 [0.84, 0.93]                        | 0.91 [0.85, 0.97]                             | 0.03 [-0.05, 0.10]                                      |
| Well-being                                  | 12 Month         | 971 (432)                     | 0.12 [-0.35, 0.59]                       | 0.22 [-0.31, 0.75]                            | 0.10 [-0.61, 0.82]                                      |
|                                             | 24 Month         | 869 (372)                     | -0.85 [-1.34, -0.37]                     | -0.43 [-0.99, 0.13]                           | 0.42 [-0.32, 1.17]                                      |
| PE Psychological needs support from teacher | 12 Month         | 1001 (444)                    | -0.09 [-0.16, -0.02]                     | -0.09 [-0.16, -0.01]                          | 0.00 [-0.10, 0.11]                                      |
| PE Psychological needs support from teacher | 24 Month         | 890 (384)                     | -0.36 [-0.43, -0.29]                     | -0.19 [-0.27, -0.11]                          | 0.17 [0.06, 0.27]                                       |
| PE Concentration                            | 12 Month         | 1001 (444)                    | -0.09 [-0.15, -0.03]                     | -0.06 [-0.12, 0.01]                           | 0.03 [-0.06, 0.12]                                      |
|                                             | 24 Month         | 890 (384)                     | -0.24 [-0.30, -0.18]                     | -0.24 [-0.31, -0.17]                          | -0.00 [-0.10, 0.09]                                     |
| PE Effort                                   | 12 Month         | 1001 (444)                    | -0.07 [-0.13, -0.01]                     | -0.06 [-0.13, 0.00]                           | 0.00 [-0.09, 0.09]                                      |
|                                             | 24 Month         | 890 (384)                     | -0.23 [-0.30, -0.17]                     | -0.27 [-0.34, -0.20]                          | -0.04 [-0.13, 0.06]                                     |
| PE Learning strategy use                    | 12 Month         | 1001 (444)                    | -0.17 [-0.25, -0.09]                     | -0.15 [-0.24, -0.06]                          | 0.02 [-0.11, 0.15]                                      |
|                                             | 24 Month         | 890 (384)                     | -0.42 [-0.51, -0.33]                     | -0.46 [-0.55, -0.36]                          | -0.04 [-0.17, 0.09]                                     |
| PE Enjoyment                                | 12 Month         | 1001 (444)                    | -0.13 [-0.21, -0.06]                     | -0.07 [-0.16, 0.01]                           | 0.06 [-0.05, 0.17]                                      |
|                                             | 24 Month         | 890 (384)                     | -0.33 [-0.41, -0.25]                     | -0.32 [-0.41, -0.23]                          | 0.01 [-0.10, 0.13]                                      |

Note: PA = Physical Activity; MVPA = Moderate-to-Vigorous Physical Activity. NAPLAN = National Assessment Program – Literacy and Numeracy; PE = Physical Education. Well-being can range from 10 (very low well-being) to 50 (very high well-being). PE Psychological needs support from the teacher, PE concentration, effort, PE learning strategy use, and PE enjoyment can range from 1 (low) to 5 (high).

**eTable 8. Sub-sample Variables Baseline Values**

| Variable                     | N<br>(n intervention) | Control<br>Mean | Control SD | Intervention<br>Mean | Intervention<br>SD | Total Mean | Total SD |
|------------------------------|-----------------------|-----------------|------------|----------------------|--------------------|------------|----------|
| Fundamental Movement Skills  | 359 (188)             | 1.90            | 0.60       | 1.82                 | 0.67               | 1.86       | 0.64     |
| Response Accuracy AX         | 174 (91)              | 44.69           | 26.83      | 56.36                | 24.34              | 50.79      | 26.15    |
| Response Accuracy AY         | 167 (87)              | 39.06           | 24.09      | 46.50                | 22.81              | 42.94      | 23.66    |
| Response Accuracy BX         | 167 (88)              | 47.63           | 27.47      | 60.27                | 27.25              | 54.29      | 28.00    |
| Cognitive Reaction Time AX   | 174 (91)              | 411.74          | 147.18     | 389.87               | 127.71             | 400.31     | 137.38   |
| Cognitive Reaction Time AY   | 167 (87)              | 548.13          | 176.48     | 492.05               | 124.87             | 518.92     | 153.92   |
| Cognitive Reaction Time BX   | 167 (88)              | 453.63          | 188.66     | 413.75               | 105.91             | 432.62     | 151.67   |
| Overall Response Accuracy AX | 173 (91)              | 48.51           | 19.50      | 56.55                | 17.99              | 52.74      | 19.10    |
| Overall Response Accuracy AY | 166 (87)              | 60.81           | 18.62      | 68.72                | 14.95              | 64.96      | 17.21    |
| Overall Response Accuracy BX | 167 (88)              | 55.85           | 17.06      | 58.24                | 15.60              | 57.11      | 16.30    |

Note: AX/AY/BX refers to the cognitive test condition (cue and probe).

**eTable 9. Sub-sample Variables Outcome Analyses**

| Variable                     | Follow-up | N<br>(n intervention) | Change from Baseline:<br>Control | Change from Baseline:<br>Intervention | Adjusted Difference<br>(intervention v control) |
|------------------------------|-----------|-----------------------|----------------------------------|---------------------------------------|-------------------------------------------------|
| Fundamental Movement Skills  | 12 Month  | 270 (137)             | 0.03 [-0.08, 0.13]               | 0.06 [-0.04, 0.17]                    | 0.04 [-0.12, 0.19]                              |
|                              | 24 Month  | 184 (79)              | 0.01 [-0.12, 0.14]               | -0.08 [-0.21, 0.05]                   | -0.09 [-0.27, 0.09]                             |
| Response Accuracy AX         | 12 Month  | 146 (74)              | 5.15 [0.11, 10.35]               | 3.85 [-0.89, 8.74]                    | -1.30 [-8.44, 5.85]                             |
|                              | 24 Month  | 116 (59)              | 4.91 [-0.63, 10.61]              | 2.42 [-3.06, 7.63]                    | -2.49 [-10.39, 5.24]                            |
| Response Accuracy AY         | 12 Month  | 142 (72)              | 3.20 [-2.78, 8.96]               | 6.07 [0.66, 11.40]                    | 2.86 [-5.17, 10.70]                             |
|                              | 24 Month  | 111 (56)              | 6.63 [0.34, 13.22]               | 9.47 [3.64, 15.36]                    | 2.84 [-6.35, 11.77]                             |
| Response Accuracy BX         | 12 Month  | 137 (71)              | 5.62 [-0.48, 12.02]              | 2.88 [-3.26, 9.11]                    | -2.74 [-11.14, 5.62]                            |
|                              | 24 Month  | 114 (57)              | 5.46 [-1.53, 12.51]              | 1.66 [-5.17, 8.16]                    | -3.81 [-13.12, 5.75]                            |
| Cognitive Reaction Time AX   | 12 Month  | 146 (74)              | -55.23 [-83.05, -28.26]          | -38.45 [-65.07, -12.43]               | 16.78 [-21.44, 55.02]                           |
|                              | 24 Month  | 116 (59)              | -44.62 [-75.24, -14.52]          | -34.97 [-63.62, -6.83]                | 9.65 [-32.03, 51.26]                            |
| Cognitive Reaction Time AY   | 12 Month  | 142 (72)              | -59.79 [-97.48, -20.15]          | -23.11 [-59.39, 13.73]                | 36.67 [-15.57, 89.43]                           |
| Cognitive Reaction Time AY   | 24 Month  | 111 (56)              | -122.56 [-164.03, -81.15]        | -73.76 [-115.47, -31.96]              | 48.79 [-11.54, 109.73]                          |
| Cognitive Reaction Time BX   | 12 Month  | 137 (71)              | -55.72 [-94.04, -19.21]          | -33.88 [-69.55, 0.20]                 | 21.84 [-27.68, 76.10]                           |
|                              | 24 Month  | 114 (57)              | -72.06 [-112.43, -33.36]         | -67.95 [-103.74, -29.87]              | 4.11 [-49.53, 58.91]                            |
| Overall Response Accuracy AX | 12 Month  | 146 (74)              | 3.47 [-0.59, 7.33]               | 3.16 [-0.81, 7.01]                    | -0.31 [-5.92, 5.24]                             |
|                              | 24 Month  | 116 (59)              | 5.55 [1.10, 9.92]                | 5.44 [1.29, 9.54]                     | -0.11 [-6.12, 5.72]                             |
| Overall Response Accuracy AY | 12 Month  | 141 (72)              | 4.13 [0.20, 8.05]                | 3.18 [-0.46, 6.96]                    | -0.95 [-6.24, 4.43]                             |
|                              | 24 Month  | 111 (56)              | 0.30 [-3.70, 4.33]               | -0.28 [-4.28, 3.67]                   | -0.59 [-6.23, 5.32]                             |
| Overall Response Accuracy BX | 12 Month  | 136 (71)              | 1.95 [-2.69, 6.67]               | 0.09 [-4.55, 4.67]                    | -1.86 [-8.44, 4.87]                             |
|                              | 24 Month  | 114 (57)              | -0.73 [-5.64, 4.28]              | 1.45 [-3.37, 6.32]                    | 2.18 [-4.66, 8.93]                              |

Note: AX/AY/BX refers to the cognitive test condition (cue and probe).
