# Supplementary material
Source: PubMed Central journal article supplement (PMC8094033)
Supplement: jamapediatr-e210417-s003.pdf [file jamapediatr-e210417-s003.pdf]

# Data Sharing Statement

Lonsdale. Effect of a Scalable School-Based Intervention on Cardiorespiratory Fitness in Children. *JAMA Pediatr.* Published May 03, 2021. doi:10.1001/jamapediatrics.2021.0417

## Data

**Data available:** Yes

**Data types:** Deidentified participant data, Data dictionary

**How to access data:** [chris.lonsdale@acu.edu.au](mailto:chris.lonsdale@acu.edu.au)

**When available:** With publication, beginning date: 06-01-2022

## Supporting Documents

**Document types:** None

## Additional Information

**Who can access the data:** Researchers whose proposed use of the data has been approved

**Types of analyses:** For a specified purpose, including a study protocol and analysis plan.

**Mechanisms of data availability:** After approval of a proposal and with a signed data access agreement.
